# Supplementary material for: Regulatory networks of circRNAs related to transcription factors in Populus euphratica Oliv. heteromorphic leaves
Source: Oxford University Press journal article supplement (doi:10.1042/bsr20190540), 2019-12-01
Supplement: bsr-2019-0540_supp.pdf [file bsr-2019-0540_supp.pdf]

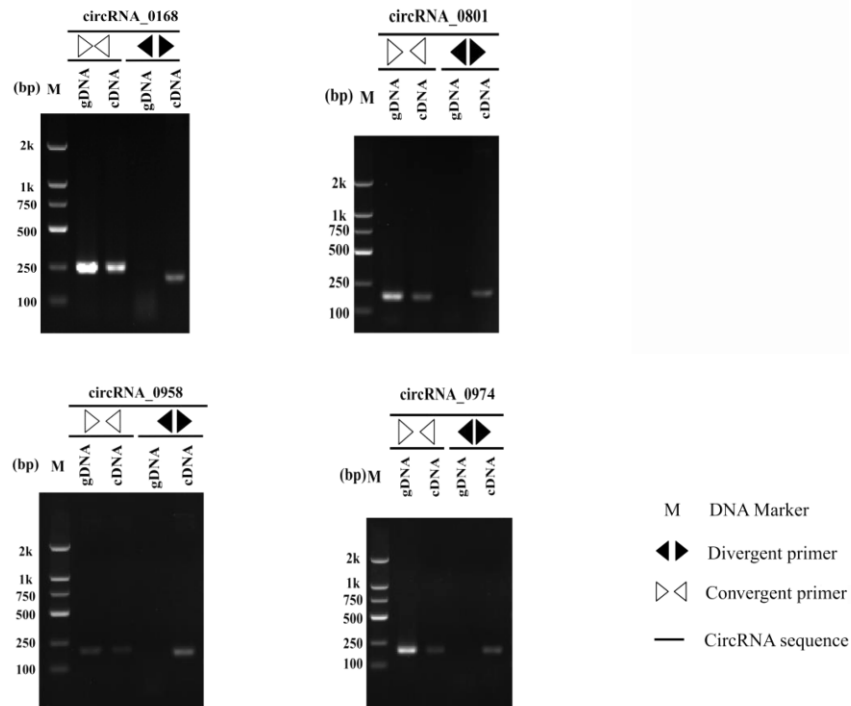

**Fig. S1. CircRNAs related to TFs that were successfully amplified in *P.h1*.**

Table S1 Sequences of primers were used in qPCR.

| RNAs*          | Primers | Sequence (5'-3')         | Product | Note    |
|----------------|---------|--------------------------|---------|---------|
| 18s RNA        | Forward | GTGGTGGTGCATGGCCGTTTC    | 80      | mRNA    |
| 18s RNA        | Reverse | TAGCAGGCTGAGGTCTCGTTTCG  |         |         |
| circRNA_0168   | Forward | AGGCCGAATCATTGGGTTTGA    | 196     | circRNA |
| circRNA_0168   | Reverse | ACCCCAAGCTGTTCCACTGA     |         |         |
| circRNA_0979   | Forward | CAGTTCTGAATTTTGCAGCCGC   | 171     | circRNA |
| circRNA_0979   | Reverse | GCAGCAACTGACCGCTACAG     |         |         |
| circRNA_1102   | Forward | TGGAGGTGCGTCAATGTCCA     | 144     | circRNA |
| circRNA_1102   | Reverse | TCCACGTTCTACAAGTGCTGGT   |         |         |
| XM_011016290.1 | Forward | CTCTCACGGCTGTTGCTGAG     | 182     | mRNA    |
| XM_011016290.1 | Reverse | TTTCTGTGAGGCGGTTTCC      |         |         |
| XM_011016291.1 | Forward | GTTGCCAGGCAGGACGGATAAC   | 161     | mRNA    |
| XM_011016291.1 | Reverse | TGGATGGTGAAGACGGCAATGATG |         |         |
| XM_011022483.1 | Forward | TAAGCCATTGCCATCTCCACAACC | 121     | mRNA    |
| XM_011022483.1 | Reverse | GGCGTGCCTCTACCAGAATTGTC  |         |         |
| NW_011500067.1 | Forward | cgaggcggaTgTagccaagTgga  |         | miRNA   |
| ptc-miR473a-3p | Forward | TGAGGCCTTTGGGGGAGAGTGG   |         | miRNA   |
| ptc-miR160e-5p | Forward | TGCCTGGCTCCCTGAATGCCA    |         | miRNA   |

RNAs\* include mRNA, miRNA and circRNA.

Table S2 Randomly selected primers of circRNAs in *Populus euphratica* Oliv. heteromorphic leaves

| circRNAs     | Primers | Sequence (5'-3')          | product |
|--------------|---------|---------------------------|---------|
| circRNA_1102 | Forward | GGAGGTGCGTCAATGTCCAA      | 216     |
| circRNA_1102 | Reverse | TCCACTGTAAAATACTTGCTGCCA  |         |
| circRNA_0168 | Forward | ACTTGAGGATTGAAGGCCGAA     | 213     |
| circRNA_0168 | Reverse | TGATACCCCAAGCTGTTCCAC     |         |
| circRNA_0958 | Forward | GGGGTGGTAGTTGCTGTGAT      | 230     |
| circRNA_0958 | Reverse | ACAGGCATCAGCCATCACTTG     |         |
| circRNA_0801 | Forward | TGAGCCAAGCAGTCTATGCG      | 216     |
| circRNA_0801 | Reverse | TTTGTCTTGCGGCTGGTTGG      |         |
| circRNA_0227 | Forward | AATTGGTGGTGCCCTTCCAC      | 222     |
| circRNA_0227 | Reverse | AGCCTTTCCTTCTTCGCAACC     |         |
| circRNA_0974 | Forward | TGACAAGAAATGACTCTCACATGCT | 210     |
| circRNA_0974 | Reverse | GTATGTTGGACGGCATAACATCCT  |         |

Table S3 Randomly selected primers of RNAs in circRNA-miRNA-TF mRNA regulatory networks

| RNAs*                | Primers | Sequence (5'-3')          | Product | Note    |
|----------------------|---------|---------------------------|---------|---------|
| circRNA_1102         | Forward | GGAGGTGCGTCAATGTCCAA      | 216     | circRNA |
| circRNA_1102         | Reverse | TCCACTGTAAAATACTTGCTGCCA  |         |         |
| circRNA_0168         | Forward | ACTTGAGGATTGAAGGCCGAA     | 213     | circRNA |
| circRNA_0168         | Reverse | TGATACCCCAAGCTGTTCCAC     |         |         |
| circRNA_0958         | Forward | GGGGTGGTAGTTGCTGTGAT      | 230     | circRNA |
| circRNA_0958         | Reverse | ACAGGCATCAGCCATCACTTG     |         |         |
| circRNA_0801         | Forward | TGAGCCAAGCAGTCTATGCG      | 216     | circRNA |
| circRNA_0801         | Reverse | TTTGTCTTGCGGCTGGTTGG      |         |         |
| circRNA_0227         | Forward | AATTGGTGGTGCCCTTCCAC      | 222     | circRNA |
| circRNA_0227         | Reverse | AGCCTTTCCTTCTTCGCAACC     |         |         |
| circRNA_0974         | Forward | TGACAAGAAATGACTCTCACATGCT | 210     | circRNA |
| circRNA_0974         | Reverse | GTATGTTGGACGGCATAACATCCT  |         |         |
| ptc-miR156g          | Forward | cgcgTTGACAGAAGATAGAGAGCAC |         | miRNA   |
| NW_011500297.1_28413 | Forward | TTTTCTTCCCCTGTTCTCTGCGTG  |         | miRNA   |
| NW_011500300.1_28478 | Forward | cgcgAATGAGAACCATCTGACATCC |         | miRNA   |
| ptc-miR473a-3p       | Forward | TGAGGCCTTTGGGGGAGAGTGG    |         | miRNA   |
| ptc-miR396c          | Forward | cgcgTTCCACAGCTTTCTTGAAGTT |         | miRNA   |
| ptc-miR319e          | Forward | gTTGACTGAAGGGAGCTCCT      |         | miRNA   |
| XM_011034944.1       | Forward | AGAGCGGAACCTGGGTCATCCTC   | 85      | mRNA    |
| XM_011034944.1       | Reverse | CTTGGTGGCTGCTGGTGCTG      |         |         |
| XM_011031202.1       | Forward | TGCGAGGTTTCATGCGAAGTCAC   | 138     | mRNA    |
| XM_011031202.1       | Reverse | GTGTCCTGCCAAACGCCTACG     |         |         |
| XM_011022862.1       | Forward | ACACCTCCTCCTCCTCCTCCTC    | 85      | mRNA    |
| XM_011022862.1       | Reverse | GGTTCTTGGATAGCGGGTTCGG    |         |         |
| XM_011016288.1       | Forward | GGAACGCCGATTTTGCCAACAG    | 110     | mRNA    |
| XM_011016288.1       | Reverse | TCCGTCGCCTTGCATTGTGATC    |         |         |
| XM_011020593.1       | Forward | ACCTGCCTCTCCGTTTCAATGC    | 97      | mRNA    |
| XM_011020593.1       | Reverse | GCTCCGGCTCCTCCTCTGC       |         |         |
| XM_011037142.1       | Forward | AGCCAGAGCCAGAACCAGAACC    | 109     | mRNA    |
| XM_011037142.1       | Reverse | GAGCGAGCGACAACCCTGAAC     |         |         |
| XM_011049364.1       | Forward | GCTAAGGCTCAGGTTGTGCT      | 112     | mRNA    |
| XM_011049364.1       | Reverse | GCCTGCGACAGCTTCTTTTG      |         |         |

RNAs\* include mRNA, miRNA and circRNA.

Table S4 The validation of regulatory relationships between miRNAs, TF mRNAs and circRNAs.

| RNAs     | Li1     | Li2     | Li3     | Li4     | <a href="#">Mean</a>  | La1     | La2     | La3     | La4     | <a href="#">Mean</a>  | Ov1     | Ov2     | Ov3     | Ov4     | <a href="#">Mean</a>  | Bo1     | Bo2     | Bo3     | Bo4     | <a href="#">Mean</a>  |
|----------|---------|---------|---------|---------|-----------------------|---------|---------|---------|---------|-----------------------|---------|---------|---------|---------|-----------------------|---------|---------|---------|---------|-----------------------|
|          |         |         |         |         | <a href="#">value</a> |         |         |         |         | <a href="#">value</a> |         |         |         |         | <a href="#">value</a> |         |         |         |         | <a href="#">value</a> |
| circRNA  | 1.01173 | 9.66046 | 9.50547 | 9.75015 | 9.75835               | 2.5076  | 2.4788  | 2.11351 | 1.95383 | 2.26343               | 7.90614 | 8.14722 | 8.16606 | 8.83343 | 8.26321               | 9.22985 | 9.96111 | 8.95674 | 0.00010 | 9.58541               |
| _0168    | E-07    | E-08    | E-08    | E-08    | E-08                  | E-05    | E-05    | E-05    | E-05    | E-05                  | E-05    | E-05    | E-05    | E-05    | E-05                  | E-05    | E-05    | E-05    | 1939    | E-05                  |
| circRNA  | 6.27738 | 5.9525  | 5.81655 | 5.63141 | 5.91946               | 8.01651 | 7.6722  | 6.42178 | 6.33337 | 7.11097               | 4.7998  | 4.60427 | 4.70102 | 5.5008  | 4.90147               | 6.85096 | 7.05986 | 6.64825 | 7.60162 | 7.04017               |
| _0958    | E-07    | E-07    | E-07    | E-07    | E-07                  | E-05    | E-05    | E-05    | E-05    | E-05                  | E-05    | E-05    | E-05    | E-05    | E-05                  | E-05    | E-05    | E-05    | E-05    | E-05                  |
| circRNA  | 2.80272 | 2.73239 | 2.609E- | 2.64542 | 2.69738               | 4.83318 | 4.8109  | 3.87172 | 3.75715 | 4.31824               | 5.33803 | 5.0268  | 5.40005 | 6.39218 | 5.53926               | 0.00027 | 0.00028 | 0.00026 | 0.00030 | 0.00028               |
| _1102    | E-07    | E-07    | 07      | E-07    | E-07                  | E-05    | E-05    | E-05    | E-05    | E-05                  | E-05    | E-05    | E-05    | E-05    | E-05                  | 4039    | 8995    | 5316    | 1965    | 2579                  |
| circRNA  | 2.11634 | 2.1608  | 2.03482 | 1.93845 | 2.0626                | 1.1031  | 1.10056 | 8.93931 | 8.81624 | 9.94804               | 5.25429 | 5.30308 | 5.71002 | 5.83E-0 | 5.52435               | 5.89774 | 5.17E-0 | 5.73647 | 6.99745 | 5.95042               |
| _0801    | E-06    | E-06    | E-06    | E-06    | E-06                  | E-06    | E-06    | E-07    | E-07    | E-07                  | E-07    | E-07    | E-07    | 7       | E-07                  | E-07    | 7       | E-07    | E-07    | E-07                  |
| circRNA  | 9.59373 | 9.93205 | 9.48353 | 8.78733 | 9.44916               | 1.95716 | 1.98907 | 1.60446 | 1.5897  | 1.7851                | 3.64375 | 4.20496 | 3.65218 | 3.85151 | 3.8381                | 1.71503 | 1.61131 | 1.66044 | 1.85091 | 1.70942               |
| _0227    | E-08    | E-08    | E-08    | E-08    | E-08                  | E-08    | E-08    | E-08    | E-08    | E-08                  | E-08    | E-08    | E-08    | E-08    | E-08                  | E-06    | E-06    | E-06    | E-06    | E-06                  |
| circRNA  | 0.00018 | 0.00018 | 0.00018 | 0.00018 | 0.00018               | 6.45153 | 5.96411 | 5.13242 | 5.05008 | 5.64954               | 6.43664 | 6.51143 | 6.21738 | 7.34268 | 6.62703               | 8.43453 | 7.56658 | 8.85386 | 8.10965 | 8.24116               |
| _0974    | 4171    | 3746    | 3746    | 8041    | 4926                  | E-05    | E-05    | E-05    | E-05    | E-05                  | E-05    | E-05    | E-05    | E-05    | E-05                  | E-05    | E-05    | E-05    | E-05    | E-05                  |
| XM_0110  | 0.00176 | 0.00181 | 0.00188 | 0.00191 | 0.00184               | 0.00028 | 0.00029 | 0.00023 | 0.00021 | 0.00026               | 0.00028 | 0.00029 | 0.00028 | 0.00031 | 0.00029               | 0.00051 | 0.00048 | 0.00050 | 0.00061 | 0.00053               |
| 34999.1  | 0255    | 8124    | 224     | 7355    | 4494                  | 9664    | 9187    | 8014    | 7505    | 1092                  | 6999    | 1678    | 7663    | 9182    | 6381                  | 8513    | 7154    | 4334    | 5196    | 1299                  |
| XM_0110  | 0.00271 | 0.00271 | 0.00259 | 0.00240 | 0.00260               | 0.00174 | 0.00169 | 0.00149 | 0.00149 | 0.00160               | 0.00144 | 0.00146 | 0.00139 | 0.00172 | 0.00150               | 0.00293 | 0.00291 | 0.00284 | 0.00310 | 0.00295               |
| 31202.1  | 155     | 7822    | 5089    | 4579    | 726                   | 4062    | 2455    | 7391    | 7391    | 7825                  | 3046    | 6575    | 7115    | 4029    | 7691                  | 9935    | 2889    | 6359    | 7564    | 1687                  |
| XM_0110  | 0.00023 | 0.00022 | 0.00022 | 0.00022 | 0.00022               | 0.00160 | 0.00150 | 0.00126 | 0.00122 | 0.00139               | 0.00248 | 0.00251 | 0.00238 | 0.00278 | 0.00254               | 0.00228 | 0.00230 | 0.00221 | 0.00247 | 0.00231               |
| 22862.1  | 6917    | 9376    | 1051    | 1562    | 7226                  | 4864    | 4326    | 7909    | 1893    | 9748                  | 3631    | 8301    | 7969    | 1348    | 2812                  | 5407    | 1303    | 2664    | 2181    | 7889                  |
| XM_0110  | 0.00637 | 0.00598 | 0.00636 | 0.00631 | 0.00626               | 0.00749 | 0.00715 | 0.00627 | 0.00641 | 0.00683               | 0.01197 | 0.01149 | 0.01195 | 0.01257 | 0.01199               | 0.01526 | 0.01610 | 0.01481 | 0.01690 | 0.01577               |
| 16288.1  | 5113    | 9564    | 0401    | 6466    | 0386                  | 4251    | 5823    | 2835    | 9456    | 5591                  | 9128    | 1147    | 1482    | 469     | 9112                  | 8125    | 1438    | 6344    | 1948    | 1964                  |
| XM_0110  | 0.00955 | 0.00984 | 0.00957 | 0.00977 | 0.00968               | 0.00988 | 0.00966 | 0.00784 | 0.00756 | 0.00874               | 0.00955 | 0.00984 | 0.00968 | 0.01128 | 0.01009               | 0.01035 | 0.00995 | 0.01000 | 0.01064 | 0.01024               |
| 20593.1  | 1877    | 3133    | 3972    | 5142    | 6031                  | 8723    | 2865    | 8685    | 3834    | 1027                  | 1877    | 3133    | 5216    | 0697    | 0231                  | 6402    | 7505    | 3625    | 756     | 1273                  |
| XM_0110  | 0.00926 | 0.00912 | 0.00866 | 0.00920 | 0.00906               | 0.00465 | 0.00461 | 0.00363 | 0.00367 | 0.00414               | 0.00415 | 0.00412 | 0.00437 | 0.00509 | 0.00443               | 0.00383 | 0.00404 | 0.00371 | 0.00452 | 0.00403               |
| 37142.1  | 9239    | 053     | 8512    | 5212    | 5873                  | 6086    | 3253    | 6249    | 0011    | 3899                  | 7696    | 8977    | 4498    | 5125    | 9074                  | 471     | 4004    | 2654    | 8765    | 0033                  |
| XM_0110  | 1.01174 | 9.62046 | 9.52547 | 9.74015 | 9.75E-0               | 2.5176  | 2.4988  | 2.21351 | 1.93383 | 2.29E-0               | 7.95614 | 8.24722 | 8.26606 | 8.85343 | 8.33E-0               | 9.25985 | 9.96311 | 8.95686 | 0.00020 | 1.21E-0               |
| 49364.1  | E-07    | E-08    | E-08    | E-08    | 8                     | E-05    | E-05    | E-05    | E-05    | 5                     | E-05    | E-05    | E-05    | E-05    | 5                     | E-05    | E-05    | E-05    | 1939    | 4                     |
| ptc-miR1 | 0.00044 | 0.00044 | 0.00044 | 0.00042 | 0.00044               | 0.00022 | 0.00023 | 0.00019 | 0.00018 | 0.00021               | 0.00018 | 0.00018 | 0.00018 | 0.00021 | 0.00019               | 0.00019 | 0.00018 | 0.00019 | 0.00020 | 0.00019               |
| 56g      | 0064    | 931     | 931     | 7042    | 1432                  | 9906    | 1505    | 4672    | 7174    | 0814                  | 6311    | 1216    | 2477    | 451     | 1129                  | 648     | 4597    | 0226    | 2471    | 3443                  |
| NW_011   | 9.51129 | 9.51129 | 9.46744 | 9.53329 | 9.50582               | 2.73772 | 2.71881 | 2.31815 | 2.32889 | 2.52589               | 8.27199 | 8.06441 | 8.31031 | 9.32801 | 8.49368               | 8.76387 | 8.23386 | 9.17835 | 9.07293 | 8.81225               |
| 500297.1 | E-05    | E-05    | E-05    | E-05    | E-05                  | E-05    | E-05    | E-05    | E-05    | E-05                  | E-06    | E-06    | E-06    | E-06    | E-06                  | E-06    | E-06    | E-06    | E-06    | E-06                  |
| _28413   |         |         |         |         |                       |         |         |         |         |                       |         |         |         |         |                       |         |         |         |         |                       |
| NW_011   | 0.00133 | 0.00135 | 0.00132 | 0.00121 | 0.00130               | 0.00068 | 0.00070 | 0.00058 | 0.00057 | 0.00063               | 0.00044 | 0.00043 | 0.00043 | 0.00049 | 0.00045               | 9.6218  | 9.68873 | 9.3371  | 0.00010 | 9.76394               |
| 500300.1 | 4024    | 8911    | 1751    | 0652    | 6335                  | 894     | 5044    | 3357    | 9327    | 9167                  | 5177    | 7024    | 3004    | 9694    | 3725                  | E-05    | E-05    | E-05    | 4081    | E-05                  |
| _28478   |         |         |         |         |                       |         |         |         |         |                       |         |         |         |         |                       |         |         |         |         |                       |
| ptc-miR4 | 0.02597 | 0.02658 | 0.02621 | 0.02701 | 0.02644               | 0.01332 | 0.01350 | 0.01130 | 0.01130 | 0.01236               | 0.01774 | 0.01551 | 0.01770 | 0.01811 | 0.01726               | 0.01481 | 0.01491 | 0.01434 | 0.01717 | 0.01531               |
| 73a-3p   | 6184    | 3349    | 7368    | 6788    | 8422                  | 242     | 8394    | 6791    | 6791    | 1099                  | 2257    | 707     | 1311    | 5059    | 8924                  | 6344    | 94      | 475     | 7533    | 4507                  |
| ptc-miR3 | 0.00049 | 0.00047 | 0.00045 | 0.00043 | 0.00046               | 0.00141 | 0.00139 | 0.00115 | 0.00114 | 0.00127               | 0.00227 | 0.00226 | 0.00227 | 0.00248 | 0.00232               | 0.00272 | 0.00261 | 0.00264 | 0.00294 | 0.00273               |
| 96c      | 6243    | 4929    | 4531    | 7024    | 5682                  | 0087    | 0674    | 5981    | 2703    | 4861                  | 487     | 962     | 487     | 9376    | 7184                  | 4109    | 9184    | 9618    | 6736    | 4912                  |
| ptc-miR3 | 0.02134 | 0.02042 | 0.02005 | 0.02080 | 0.02065               | 0.06871 | 0.07162 | 0.06065 | 0.05995 | 0.06523               | 0.06636 | 0.06792 | 0.06698 | 0.07484 | 0.06902               | 0.04161 | 0.04491 | 0.04029 | 0.04288 | 0.04242               |

19e 4379 7644 353 8739 8573 0132 796 0639 4007 5685 9613 0929 5841 2419 9701 7477 4757 2822 6478 7884

---

Mean value represented the fold changes between the randomly selected experimental group genes and 18S RNA as the control gene by three technical replicates and four biological replicates.

Table S5 qPCR validation of the regulatory relationship of circRNAs-miRNAs-TF mRNAs in *Populus euphratica* Oliv. heteromorphic leaves

| Correlation<br>coefficient1(CC1) | circRNAs     | miRNAs               | TF mRNAs       | Correlation<br>coefficient2(CC2) |
|----------------------------------|--------------|----------------------|----------------|----------------------------------|
| -0.5255                          | circRNA_1102 | ptc-miR156g          | XM_011034944.1 | 0.3545                           |
| -0.5255                          | circRNA_1102 | ptc-miR156g          | XM_011031202.1 | -0.6504                          |
| -0.5255                          | circRNA_1102 | ptc-miR156g          | XM_011049364.1 | -0.7278                          |
| -0.8399                          | circRNA_0168 | NW_011500297.1_28413 | XM_011031202.1 | -0.5904                          |
| -0.8399                          | circRNA_0168 | NW_011500297.1_28413 | XM_011049364.1 | -0.6039                          |
| -0.7703                          | circRNA_0168 | ptc-miR156g          | XM_011031202.1 | <b>0.382</b>                     |
| -0.7703                          | circRNA_0168 | ptc-miR156g          | XM_011034944.1 | -0.3545                          |
| -0.7703                          | circRNA_0168 | ptc-miR156g          | XM_011049364.1 | -0.7278                          |
| -0.3948                          | circRNA_0168 | ptc-miR396c          | XM_011034944.1 | -0.2904                          |
| -0.3948                          | circRNA_0168 | ptc-miR396c          | XM_011031202.1 | -0.3461                          |
| -0.3948                          | circRNA_0168 | ptc-miR396c          | XM_011049364.1 | -0.5628                          |
| -0.9124                          | circRNA_0958 | NW_011500300.1_28478 | XM_011022862.1 | -0.7576                          |
| <b>0.6515</b>                    | circRNA_0227 | ptc-miR396c          | XM_011020593.1 | <b>0.5914</b>                    |
| -0.3253                          | circRNA_0227 | ptc-miR156g          | XM_011034944.1 | -0.3427                          |
| -0.4411                          | circRNA_0801 | ptc-miR473a-3p       | XM_011016288.1 | -0.4634                          |
| <b>0.9769</b>                    | circRNA_0801 | ptc-miR156g          | XM_011016288.1 | -0.633                           |
| -0.5255                          | circRNA_1102 | ptc-miR156g          | XM_011031202.1 | <b>0.382</b>                     |
| -0.0214                          | circRNA_1102 | ptc-miR319e          | XM_011034999.1 | -0.9221                          |
| -0.9202                          | circRNA_0974 | ptc-miR396c          | XM_011034999.1 | -0.7148                          |
| <b>0.9717</b>                    | circRNA_0974 | ptc-miR156g          | XM_011016288.1 | -0.633                           |
| -0.9202                          | circRNA_0974 | ptc-miR319e          | XM_011037142.1 | 0.8202                           |

CC1 and CC2 represent the correlation coefficient between circRNAs and miRNAs, TF mRNAs and miRNAs, respectively. The red represents the positive correlation coefficient.
